# Supplementary material for: Differential pulse voltammetric determination of an immunosuppressive drug teriflunomide on an edge plane pyrolytic graphite electrode
Source: Royal Society of Chemistry journal article supplement (doi:10.1039/c7ra00407a), 2017-01-01
Supplement: c7ra00407a1.pdf [file c7ra00407a1.pdf]

## Supplementary materials

### Differential pulse voltammetric analysis of immunosuppressive drug teriflunomide on edge plane pyrolytic graphite electrode

*Kinga Kaczmarska\**, *Mariola Brycht<sup>1</sup>*, *Andrzej Leniart<sup>1</sup>*, *Sławomira Skrzypek*

*University of Lodz, Faculty of Chemistry, Department of Inorganic and Analytical Chemistry, Tamka 12, 91-403 Lodz, Poland*

<sup>1</sup> ISE Member

\* e-mail: [kinga.kaczmarska@o2.pl](mailto:kinga.kaczmarska@o2.pl)

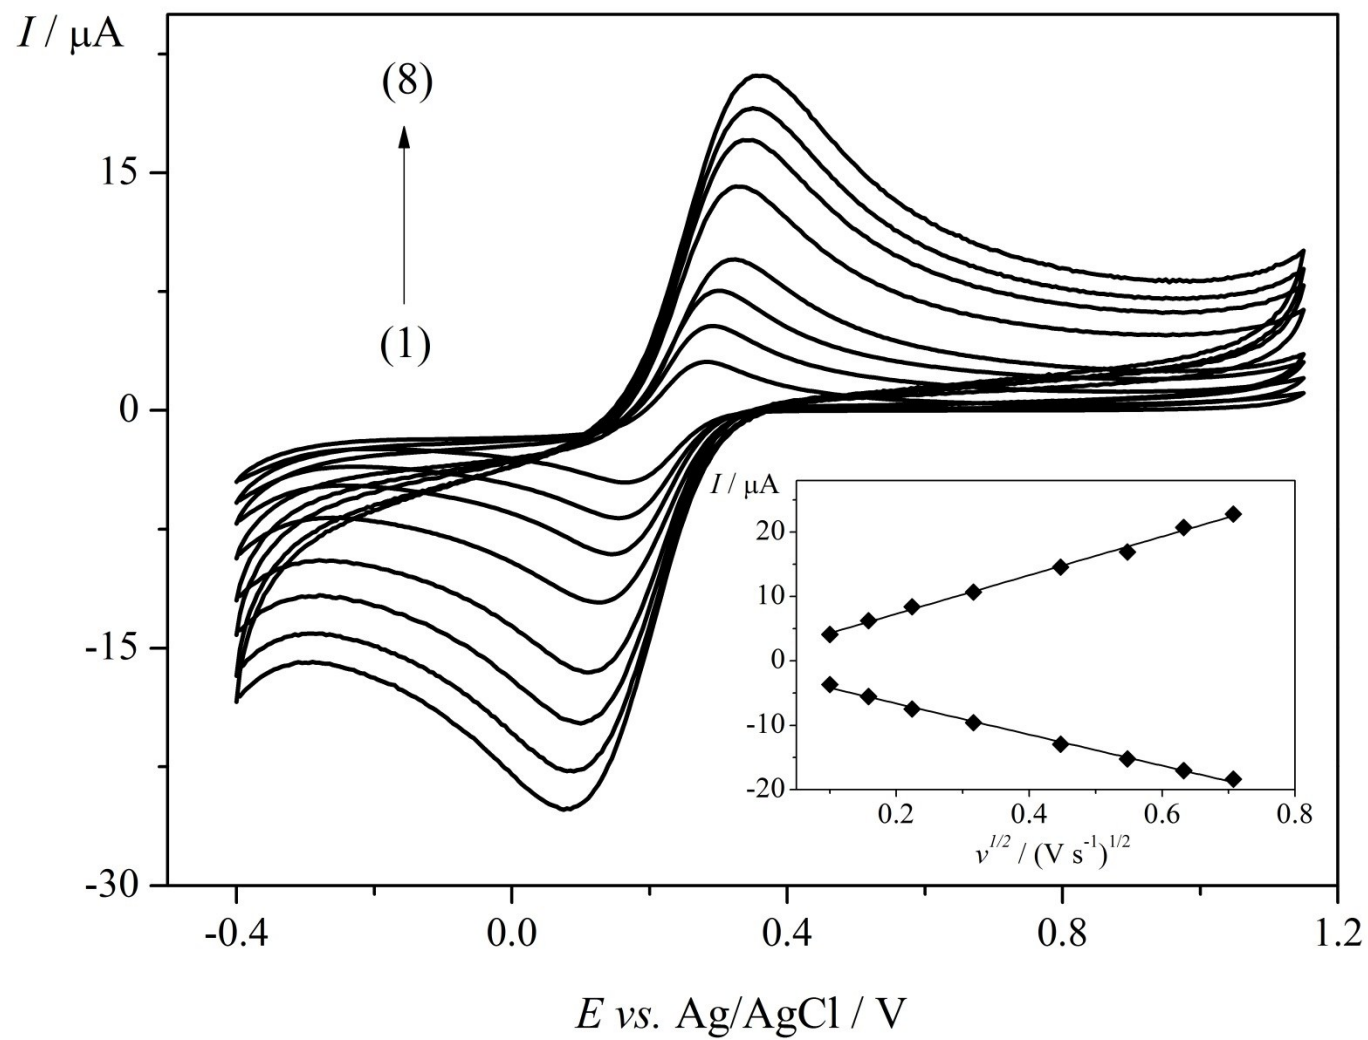

Fig. A.1. Cyclic voltammograms for the EPPGE at different scan rates (1–8: 10–500  $\text{mV s}^{-1}$ ) in  $1.0 \times 10^{-3} \text{ mol L}^{-1}$  potassium ferricyanide.

Inset: The relationship of  $I_p$  vs.  $v^{1/2}$ .

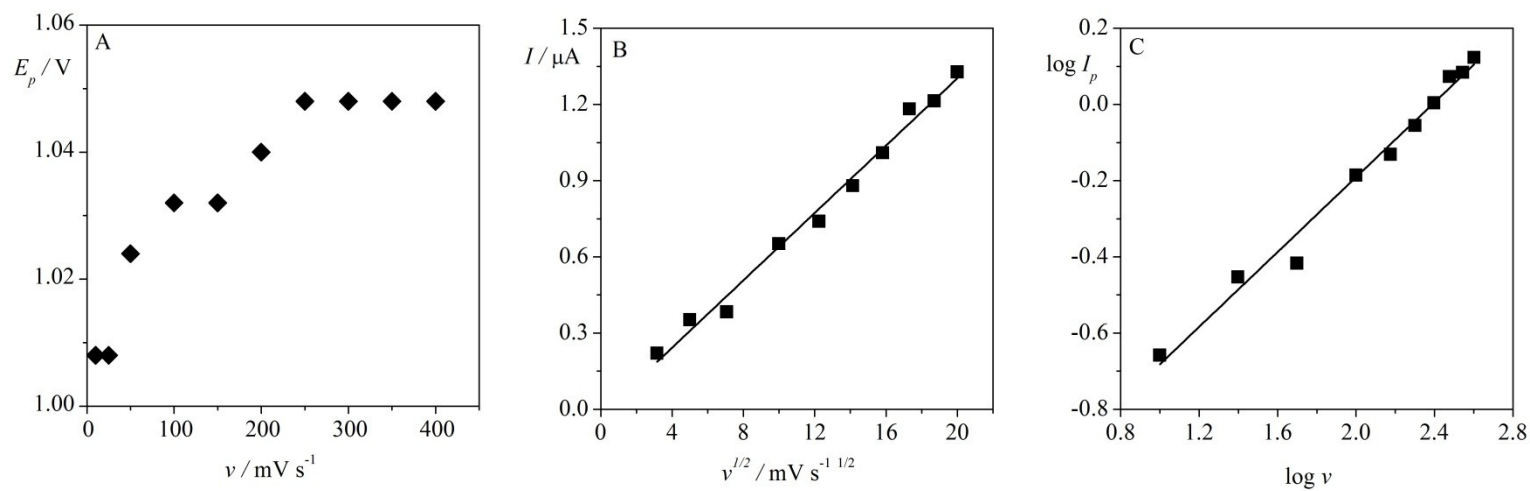

Fig. A.2. (A) The plot of the peak potential ( $E_p$ ) vs. the scan rate ( $v$ ); (B) The plot of the peak current ( $I_p$ ) vs. the square root of scan rate ( $v^{1/2}$ ); (C) The dependence of the logarithm of the peak current ( $\log I_p$ ) vs. the logarithm of scan rate ( $\log v$ ).

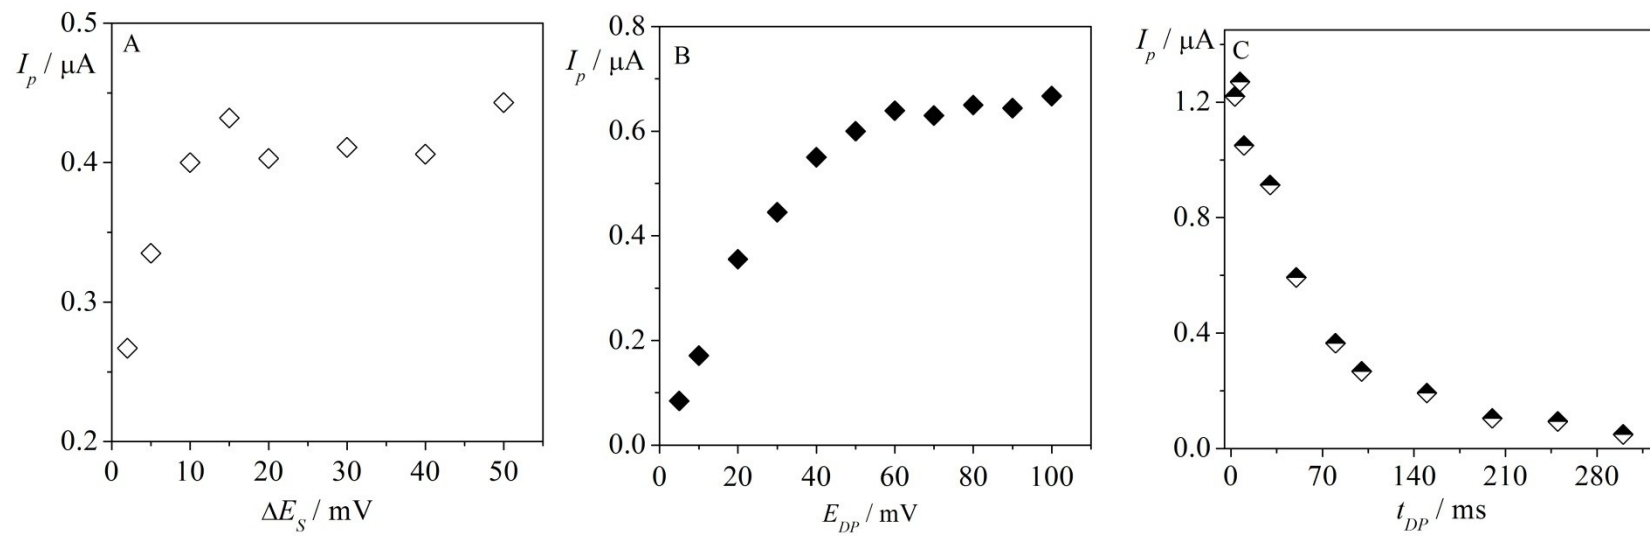

Fig. A.3. The effect of the optimization of the parameters of  $5.0 \times 10^{-5} \text{ mol L}^{-1} \text{Trf}$  obtained at EPPGE in BRBS at pH 3.0; (A) step potential ( $\Delta E_s$ ), (B) modulation amplitude ( $E_{DP}$ ), and (C) modulation time ( $t_{DP}$ ).
